# Supplementary material for: Explaining Age at Autism Spectrum Diagnosis in Children with Migrant and Non-Migrant Background in Austria
Source: PubMed Central journal article supplement (PMC7407505; doi:10.3390/brainsci10070448), 2020-07-14
Supplement: brainsci-10-00448-s001.pdf [file brainsci-10-00448-s001.pdf]

**Supplementary:**

**Table 1.** Sample characteristics by migration status based on multiple imputed data.

|                                                   | Values               | %M  | Total (N=211)                | Non-migrants (n=91)          | Migrants (n=120)             | Difference              |          |
|---------------------------------------------------|----------------------|-----|------------------------------|------------------------------|------------------------------|-------------------------|----------|
|                                                   |                      |     | M [SD] or n <sup>b</sup> (%) | M [SD] or n <sup>b</sup> (%) | M [SD] or n <sup>b</sup> (%) | ES <i>r<sup>a</sup></i> | <i>p</i> |
| <i>Age at diagnosis</i>                           | 12 - 119 <i>m.o.</i> | 0%  | 46.7 [22.80]                 | 53.96 [26.86]                | 41.19 [17.33]                | 0.278                   | <.001    |
| <b>Sociodemographic characteristics</b>           |                      |     |                              |                              |                              |                         |          |
| Family residence in urban area                    | No/Yes               | 0%  | 148 (70.1%)                  | 51 (56.0%)                   | 97 (80.8%)                   | 0.268                   | <0.001   |
| <i>Distance to hospital</i>                       | 0 – 187 <i>km</i>    | 0%  | 38.27 [37.50]                | 49.27 [41.67]                | 29.93 [31.73]                | 0.256                   | <0.001   |
| Parental level of education above High school     | No/Yes               | 41% | (28.3%)                      | (38.8%)                      | (20.3%)                      | 0.204                   | 0.017    |
| <b>Clinical characteristics</b>                   |                      |     |                              |                              |                              |                         |          |
| Male gender                                       | No/Yes               | 0%  | 174 (82.5%)                  | 77 (84.6%)                   | 97 (80.8%)                   | 0.049                   | 0.474    |
| <i>Non-verbal Developmental Quotient, (D/IQ)</i>  | 16 - 122             | 13% | 62.06 [19.02]                | 65.62[21.16]                 | 59.36 [16.69]                | 0.136                   | 0.026    |
| D/IQ 50 or below                                  | No/Yes               | 13% | (23.7%)                      | (22.3%)                      | (24.7%)                      | 0.028                   | 0.701    |
| <i>Expressive Language Quotient (ELQ)</i>         | 13 -128              | 15% | 48.02 [25.42]                | 58.24 [29.03]                | 40.27 [18.89]                | 0.350                   | <0.001   |
| ELQ 50 or below                                   | No/Yes               | 15% | (66.3%)                      | (49.0%)                      | (79.3%)                      | 0.318                   | <0.001   |
| <i>Receptive Language Quotient (RLQ)</i>          | 15 - 133             | 15% | 49.62 [25.51]                | 60.46 [29.08]                | 41.39 [18.58]                | 0.370                   | <0.001   |
| RLQ score 50 or below                             | No/Yes               | 15% | (63.6%)                      | (46.2%)                      | (76.8%)                      | 0.315                   | <0.001   |
| <i>ADOS-Calibrated Severity Scores -Total CSS</i> |                      |     |                              |                              |                              |                         |          |
| <i>Social Affect-CSS</i>                          | 1 - 10               | 18% | 6.35 [2.25]                  | 5.85 [2.25]                  | 6.72 [2.18]                  | 0.191                   | 0.011    |
| <i>Repetitive Behaviour-CSS</i>                   | 1 - 10               | 18% | 5.86 [1.92]                  | 5.84 [1.93]                  | 5.87 [1.90]                  | 0.009                   | 0.907    |
| <b>ICD-10 ASD Code</b>                            |                      |     |                              |                              |                              |                         |          |
| Autism disorder                                   |                      | 0%  | 122 (57.8%)                  | 38 (41.8%)                   | 84 (70.0%)                   | 0.385                   | <0.001   |

|                   |            |           |            |
|-------------------|------------|-----------|------------|
| Asperger disorder | 21 (10.0%) | 20 (22%)  | 1 (0.8%)   |
| PDD-nos           | 68 (32.2%) | 33(36.3%) | 35 (29.2%) |

**Referred by Pediatrician**      No/Yes      27%      (49.7%)      (35.8%)      (60.2%)      0.242      <0.001

Note. %M = percentage missing values, M = mean, SD = standard deviation. Data for variables with missing values are based on multiply imputed data. <sup>a</sup> Effect size estimates for differences between migrants and non-migrants in a correlation metric. <sup>b</sup> Due to possible decimal case numbers, no n is reported for imputed categorical variables.

**Table 2.** Regression models including interactions for age at diagnosis.

|                                               | M1               | M2               | M3                  | M4                  | M5                  | M6                 | M7                  | M8                  | M9                  |
|-----------------------------------------------|------------------|------------------|---------------------|---------------------|---------------------|--------------------|---------------------|---------------------|---------------------|
|                                               | b (SE)           | b (SE)           | b (SE)              | b (SE)              | b (SE)              | b (SE)             | b (SE)              | b (SE)              | b (SE)              |
| <b>Sociodemographic characteristics</b>       |                  |                  |                     |                     |                     |                    |                     |                     |                     |
| Family residence in urban area                | -0.465 (10.361)  | 1.101 (3.480)    | 1.285 (3.440)       | 1.035 (3.429)       | .985 (3.470)        | 1.196 (3.377)      | 1.156 (3.461)       | 1.191 (3.482)       | 1.143 (3.463)       |
| Distance to hospital in Km                    | -0.020 (0.038)   | -0.006 (0.113)   | -0.027 (0.038)      | -0.021 (0.038)      | -0.023 (0.038)      | -0.019 (0.038)     | -0.020 (0.038)      | -0.021 (0.038)      | -0.025 (0.039)      |
| Parental level of education above High school | -3.785 (4.102)   | -3.774 (4.116)   | 11.575<br>(14.795)  | -3.827 (4.092)      | -4.086 (4.121)      | -4.782 (4.209)     | -3.698 (4.128)      | -3.683 (4.051)      | -3.122 (4.113)      |
| Migration status                              | -6.993 (4.999)   | -5.821 (4.583)   | -3.856 (4.075)      | 5.856 (9.281)       | 2.300 (10.631)      | 1.559 (8.295)      | -4.297 (9.185)      | -19.013<br>(13.912) | -9.602*<br>(4.546)  |
| <b>Clinical characteristics</b>               |                  |                  |                     |                     |                     |                    |                     |                     |                     |
| Male gender                                   | 1.553 (3.430)    | 1.538 (3.438)    | 1.482 (3.426)       | 18.058<br>(13.692)  | 1.519 (3.465)       | 1.940 (3.454)      | 1.468 (3.424)       | 1.210 (3.353)       | 1.204 (3.350)       |
| Non-verbal Developmental Quotient             | -0.209* (0.098)  | -0.211* (0.099)  | -0.201*<br>(0.098)  | -0.215*<br>(0.097)  | -0.003 (0.280)      | -0.205*<br>(0.099) | -0.210*<br>(0.098)  | -0.213*<br>(0.096)  | -0.213*<br>(0.097)  |
| Language Composite (expressive and receptive) | 3.639*** (0.903) | 3.645*** (0.905) | 3.219***<br>(0.985) | 3.743***<br>(0.907) | 3.581***<br>(0.904) | 5.868* (2.496)     | 3.621***<br>(0.911) | 3.282***<br>(1.019) | 3.707***<br>(0.903) |
| ADOS-Calibrated Severity Scores -Total CSS    |                  |                  |                     |                     |                     |                    |                     |                     |                     |
| Social Affect-CSS                             | -0.134 (.741)    | -.131 (.741)     | -0.184 (0.732)      | -0.172 (0.740)      | -0.169 (0.738)      | -0.266 (0.763)     | 0.347 (2.538)       | -0.364 (0.788)      | -0.153 (0.734)      |

|                                                      |                   |                    |                      |                      |                      |                      |                      |                     |                      |
|------------------------------------------------------|-------------------|--------------------|----------------------|----------------------|----------------------|----------------------|----------------------|---------------------|----------------------|
| Repetitive Behaviour-CSS                             | -3.568*** (0.946) | -3.571 *** (0.948) | -3.553***<br>(0.926) | -3.506***<br>(0.931) | -3.495***<br>(0.952) | -3.405***<br>(1.002) | -3.546***<br>(0.945) | -6.977 (3.613)      | -3.572***<br>(0.937) |
| <b>Referred by Pediatrician</b>                      | -9.407** (3.375)  | -9.346* (3.396)    | -10.155**<br>(3.473) | -9.059**<br>(3.353)  | -9.376**<br>(3.353)  | -9.665**<br>(3.337)  | -9.363**<br>(3.374)  | -9.499**<br>(3.342) | -21.697<br>(12.124)  |
| <b>Interactions</b>                                  |                   |                    |                      |                      |                      |                      |                      |                     |                      |
| Migration status × Family Residence in Urban Area    | 1.132 (6.089)     |                    |                      |                      |                      |                      |                      |                     |                      |
| Migration status × Home Distance to hospital         |                   | -0.010 (0.063)     |                      |                      |                      |                      |                      |                     |                      |
| Migration status × Parental Level of Education       |                   |                    | -9.948 (8.375)       |                      |                      |                      |                      |                     |                      |
| Migration status × Male Gender                       |                   |                    |                      | -10.234<br>(7.428)   |                      |                      |                      |                     |                      |
| Migration status × Non-verbal Developmental Quotient |                   |                    |                      |                      | -0.139 (0.158)       |                      |                      |                     |                      |
| Migration status × Language Composite                |                   |                    |                      |                      |                      | -1.627 (1.604)       |                      |                     |                      |
| Migration status × Social Affect                     |                   |                    |                      |                      |                      |                      | -0.311 (1.444)       |                     |                      |
| Migration status × Repetitive Behaviour              |                   |                    |                      |                      |                      |                      |                      | 2.110 (2.139)       |                      |
| Migration status × Referred by Pediatrician          |                   |                    |                      |                      |                      |                      |                      |                     | 7.733 (6.751)        |
| R <sup>2</sup>                                       | 0.346             | 0.346              | 0.355                | 0.353                | 0.350                | 0.351                | 0.347                | 0.354               | 0.353                |

---

Note. Results are based on multiple imputed data. \*\*\* p<.001, \*\* p<.01, \* p<.05.

**Table 3.** Languages reported as the primary language in the families with migrant background grouped by geographical areas ( $n = 120$ ).

| <b>Southeastern/Eastern<br/>Europe<br/><math>n = 65</math></b> | <b>Western/Northern<br/>Europa<br/><math>n = 42</math></b> | <b>Middle East<br/><math>n = 7</math></b> | <b>Asia<br/><math>n = 4</math></b> | <b>Others<br/><math>n = 2</math></b> |
|----------------------------------------------------------------|------------------------------------------------------------|-------------------------------------------|------------------------------------|--------------------------------------|
| Albanian                                                       |                                                            |                                           |                                    |                                      |
| Bosnian                                                        |                                                            |                                           |                                    |                                      |
| Bulgarian                                                      |                                                            |                                           |                                    |                                      |
| Lithuanian                                                     | English                                                    | Arabic                                    | Chinese                            |                                      |
| Macedonian                                                     | Italian                                                    | Farsi                                     | Mongolian                          |                                      |
| Rumanian                                                       | Dutch                                                      | Turkish                                   | Bengali                            | Ethiopian                            |
| Serbo-Croatian                                                 | Portuguese                                                 | Kumykish                                  | Pandschabi                         |                                      |
| Chechen                                                        | Spanish                                                    | Persian                                   |                                    |                                      |
| Slovakian                                                      |                                                            |                                           |                                    |                                      |
| Hungarian                                                      |                                                            |                                           |                                    |                                      |
